# Supplementary material for: Cuboctahedral Pd nanoparticles on WC for enhanced methanol electrooxidation in alkaline solution
Source: Royal Society of Chemistry journal article supplement (doi:10.1039/c0cc03431b), 2010-01-01
Supplement: c0cc03431b.pdf [file c0cc03431b.pdf]

## Supporting Information

# Cuboctahedral Pd nanoparticles on WC for Enhanced Methanol Electrooxidation in Alkaline Solution

*Young-Woo Lee, A-Ra Ko, Sang-Beom Han, Hyun-Su Kim, Do-Young Kim,*

*Si-Jin Kim, and Kyung-Won Park\**

Department of Chemical and Environmental Engineering, Soongsil University

Seoul 156743, Republic of Korea

\*Corresponding author. E-mail: kwpark@ssu.ac.kr

## Experimental

**Synthesis of WC.** Tungsten oxide hydrate were synthesized by hydrothermal method. Sodium metatungstate hydrate ( $3\text{Na}_2\text{WO}_4 \cdot 9\text{WO}_3 \cdot x\text{H}_2\text{O}$ , Aldrich) as precursor was dissolved in 5 M hydrochloric acid (Sigma) solution by vigorous stirring at an ambient room temperature or below. The resulting precursor solutions were heated to 120 °C at a heating rate of approximately 3 °C min<sup>-1</sup>. With vigorous stirring, the acidic tungstate solutions were aged at that temperature for 60 min to allow a complete precipitating reaction. The resulting precipitates were thoroughly washed with de-ionized water, filtered by using a filtration and finally dried at 70 °C overnight.

Next, Tungsten oxide obtained by hydrothermal method, was loaded into an alumina boat, which was then inserted into a vitreous silica tube inside a cylindrical furnace. A gas mixture of 20 ml min<sup>-1</sup> CH<sub>4</sub> with 80 ml min<sup>-1</sup> H<sub>2</sub> was passed through the quartz tube at a rate of 100 ml min<sup>-1</sup> during the entire reaction. Tungsten carbide samples studied in this work were prepared at 900 °C. After carburization, all of the samples were passivated in a air gas flow for more than 5h before being removed from silica tube.

**Synthesis of cuboctahedral Pd NPs on WC support catalyst.** The as-prepared WC supported Pd nanoparticles were prepared by reducing Pd salt in ethylene glycol (EG) solution. A solution of 2 mM Na<sub>2</sub>PdCl<sub>4</sub>, 10 mM NaNO<sub>3</sub>, and 20 μM FeCl<sub>3</sub> was dissolved in 50 ml of EG with 50 mg poly(vinyl pyrrolidone) (PVP, MW = 29,000). The mixed Pd salt solution and as-prepared WC (255.4 mg) treated were added to the solution and mixed with continuous stirring at room temperature. All chemicals used were of analytical grade. The solution was raised by 5 °C min<sup>-1</sup> and was kept for 90 min at 250 °C until Na<sub>2</sub>PdCl<sub>4</sub> was completely reduced by EG. The resulting colloid solution was cooled at room temperature, washed with water and then with ethanol several times to remove ethylene glycol and excess PVP.

**Characterizations.** For the structure analysis of the catalysts, X-ray diffraction (XRD) analysis was carried out using Rigaku X-ray diffractometer with Cu K<sub>α</sub> ( $\lambda = 0.15418$  nm) source with a Ni filter. The source was operated at 40 kV and 100 mA. The 2θ angular scan from 20° to 80° was explored at a scan rate of 5° min<sup>-1</sup>. For all the XRD measurement, the resolution in the scans was kept at 0.02°. The

morphology and size distribution of the catalysts were characterized by field-emission transmission electron microscopy (FE-TEM) using a Tecnai G2 F30 system operating at 300 kV. TEM samples were prepared by placing drops of catalyst suspension dispersed in ethanol on a carbon-coated copper grid. Energy dispersive X-ray (EDX) analysis of the catalysts was performed on a field emission transmission electron microscope (FE-TEM, Tecnai G2 F30 system).

Electrochemical properties of the catalysts were measured in a three-electrode cell at 25 °C using a potentiostat (Eco Chemie, AUTOLAB). A Pt wire and Hg/HgO (in saturated 1.0 M NaOH) were used as a counter and reference electrode, respectively. The glassy carbon electrode as a working electrode was polished with 1, 0.3, and 0.05  $\mu\text{m}$   $\text{Al}_2\text{O}_3$  paste and then washed in deionized water. The catalyst ink was prepared by ultrasonically dispersing catalyst powders in an appropriate amount of Millipore water. The catalyst ink was dropped onto a glassy carbon working electrode (geometrical area of 0.0706  $\text{cm}^2$ ). After drying in 50 °C oven, total metal loading of cuboctahedral Pd/WC and Pd/C was 8 and 20  $\mu\text{g cm}^{-2}$ , respectively. To compare electrochemical properties and catalytic activity of the catalysts, cyclic voltammograms (CVs) were obtained between -0.8 to +0.2 V in 1.0 M KOH and 2.0 M KOH + 2 M  $\text{CH}_3\text{OH}$ , respectively.

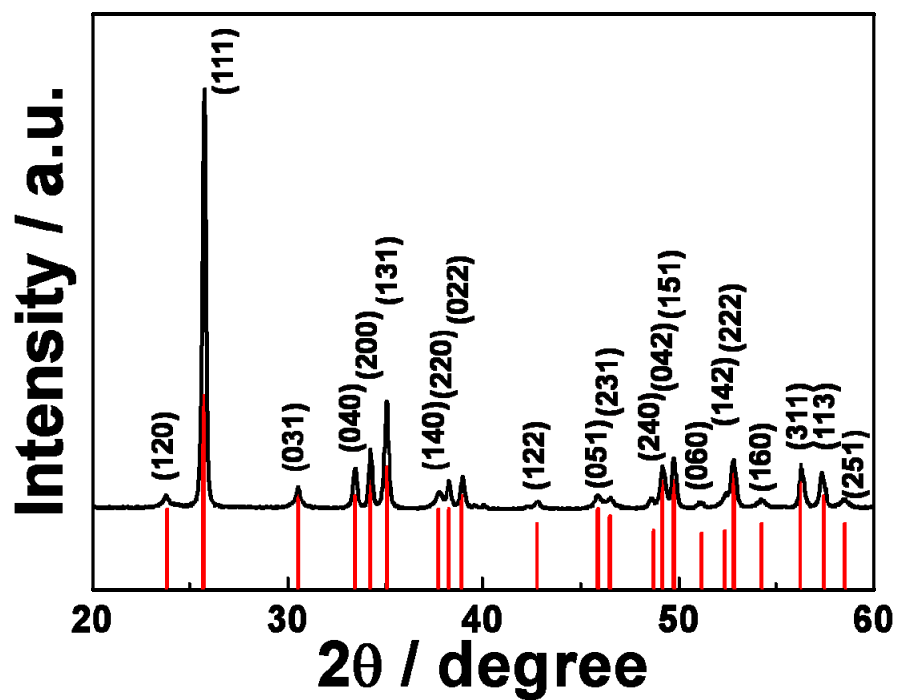

*Figure S1.* X-ray diffraction pattern of as-prepared  $\text{WO}_3 \cdot \text{H}_2\text{O}$  measured in the scan range  $20\text{-}60^\circ$  as compared with that of the reference (JCPDS No. 43-0679).

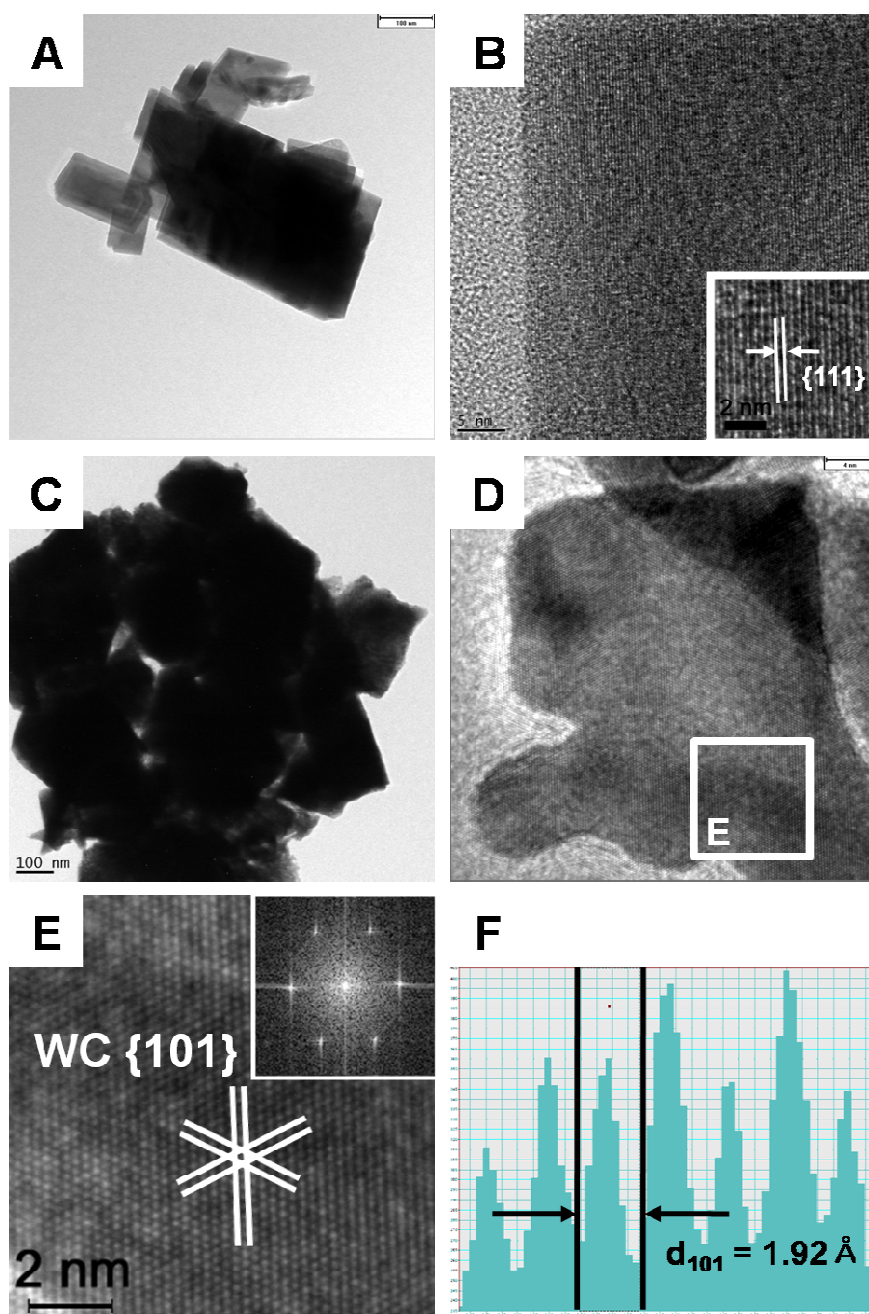

**Figure S2.** (A) Field-emission transmission electron microscopy (FE-TEM) and (B) high-resolution transmission electron microscopy (HR-TEM) images of as-prepared  $\text{WO}_3 \cdot \text{H}_2\text{O}$  particles. (C) FE-TEM and (D) HR-TEM images of as-synthesized WC particles. (E) HR-TEM image of WC containing  $\{101\}$  facets. The inset indicates a FFT pattern of WC. (F) The profile of the lattice fringe of WC with  $\{101\}$  facets.

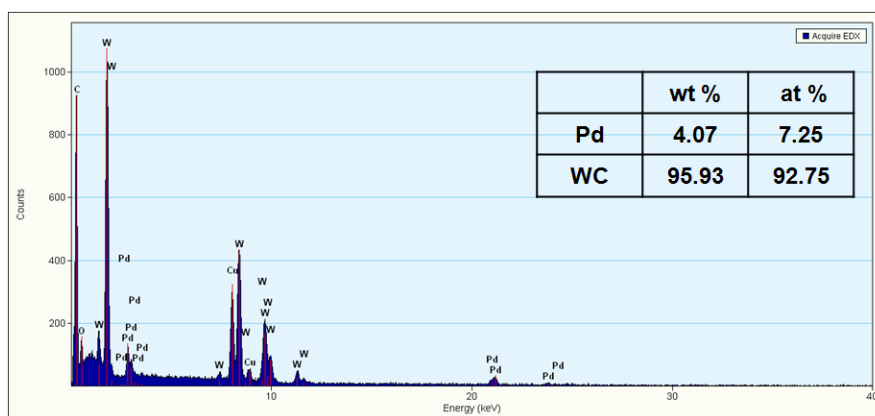

**Figure S3.** Composition and weight ratio of Pd NPs and WC obtained by means of EDX analysis.
